# Supplementary material for: “Turn on” room-temperature phosphorescent biosensors for detection of hyaluronic acid based on manganese-doped ZnS quantum dots
Source: Royal Society of Chemistry journal article supplement (doi:10.1039/c7ra11858a), 2018-01-01
Supplement: c7ra11858a1.pdf [file c7ra11858a1.pdf]

1 **Supporting information**

2 **“Turn on” room-temperature phosphorescent biosensors for**  
3 **detection of hyaluronic acid based on manganese-doped ZnS**  
4 **quantum dots**

5 **Dongxia Li, Jin Qin, Jinzhi Lv, Jiajia Yang, Guiqin Yan\***

6 *Shanxi Normal University, Linfen 041004, PR China*

7

8

9

10

11

12

13

14

15

16

17

18

19

20

21

22

23

---

\* Corresponding author. Fax: (86)0357-2051249. E-mail: gqyan2013@163.com

24

25 **Table S1** Tolerance of foreign substances

| Coexisting substance | Tolerance ratio | Variation of calculated value (%) |
|----------------------|-----------------|-----------------------------------|
| NaCl                 | 1000            | +2.3                              |
| KCl                  | 1000            | +4.6                              |
| MgCl <sub>2</sub>    | 100             | -5.1                              |
| CaCl <sub>2</sub>    | 100             | +1.4                              |
| Glucose              | 300             | -4.0                              |
| Arginine             | 500             | +2.7                              |
| Cysteine             | 500             | -3.5                              |
| BSA                  | 50              | +1.6                              |
| HSA                  | 50              | +4.8                              |
| Insulin              | 50              | +3.2                              |
| ALP                  | 50              | +4.4                              |
| DNA                  | 50              | -3.3                              |

26

27

28

29

30

32 **Fig. S1** (A) TEM image of MPA-capped Mn-doped ZnS QDs. (B) Size distribution of  
33 MPA-capped Mn-doped ZnS QDs in diameter.

34 **Fig. S2** XRD images of MPA-capped Mn-doped ZnS QDs.

35 **Fig. S3** TEM image of PDAD-Mn-ZnS QDs;

36 **Fig. S4** (A) Effect of pH values on the RTP emission of the PDAD-Mn-ZnS QDs  
37 system. (B) The time-dependent RTP emission of the PDAD-Mn-ZnS QDs by HA  
38 ( $2.8 \mu\text{g mL}^{-1}$ ). The concentration of PDAD-Mn-ZnS QDs is  $10 \mu\text{g mL}^{-1}$ .

39 **Fig. S5** TEM image of PDAD-Mn- ZnS QDs/HA;

40

41

42

44 **Fig. S1**

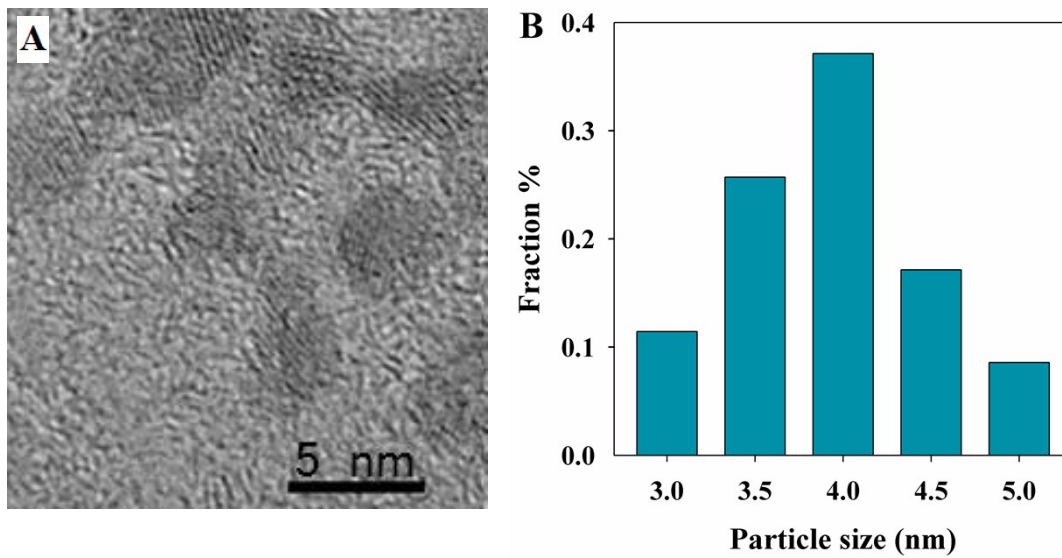

45

46 Fig. S1 (A) TEM image of MPA-capped Mn-doped ZnS QDs. (B) Size distribution of

47 MPA-capped Mn-doped ZnS QDs in diameter.

48

49

50

52 **Fig. S2**

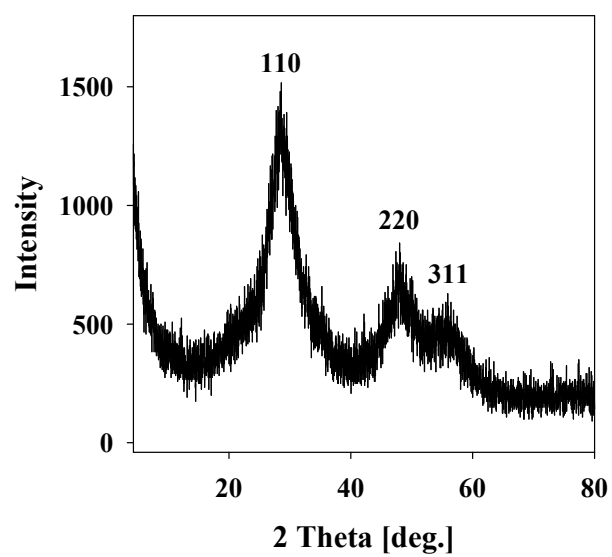

53

54 Fig. S2 XRD images of MPA-capped Mn-doped ZnS QDs.

55

56

57

58

59

61 **Fig. S3**

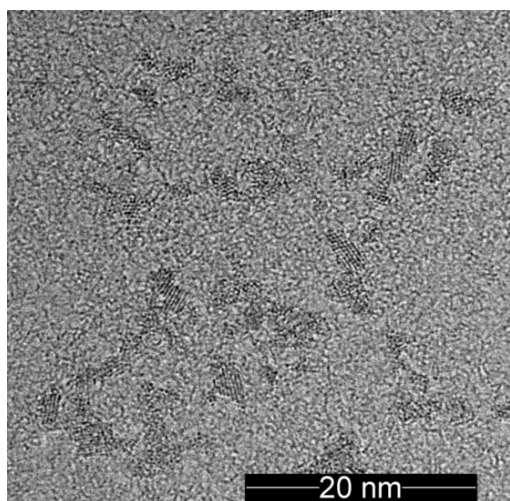

62

63 Fig. S3 TEM image of PDAD-Mn-ZnS QDs;

64

65

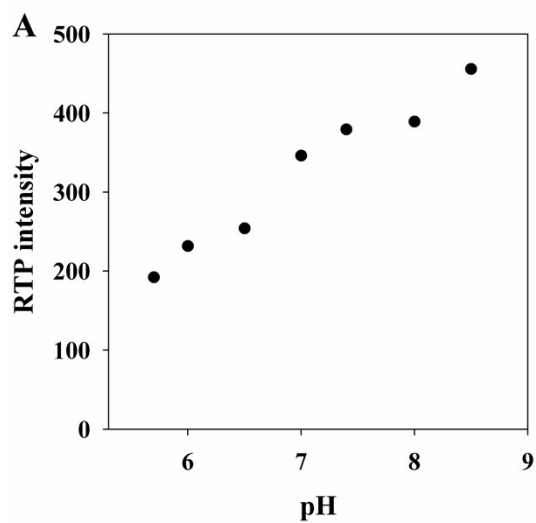

67 Fig. S4

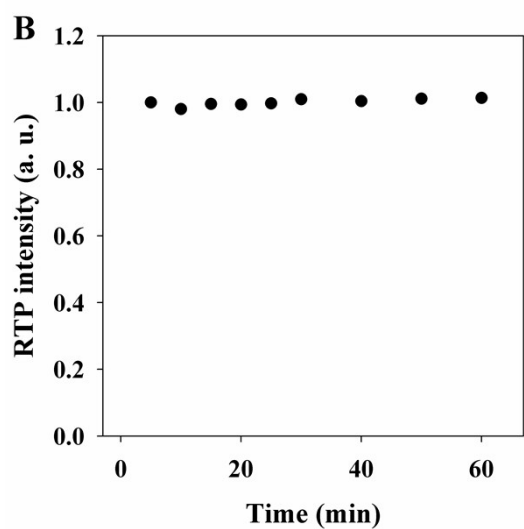

68

69 Fig. S4 (A) Effect of pH values on the RTP emission of the PDAD-Mn-ZnS QDs

70 system. (B) The time-dependent RTP emission of the PDAD-Mn-ZnS QDs by HA

71 ( $2.8 \mu\text{g mL}^{-1}$ ). The concentration of PDAD-Mn-ZnS QDs is  $10 \mu\text{g mL}^{-1}$ .

72

73

74

76 **Fig. S5**

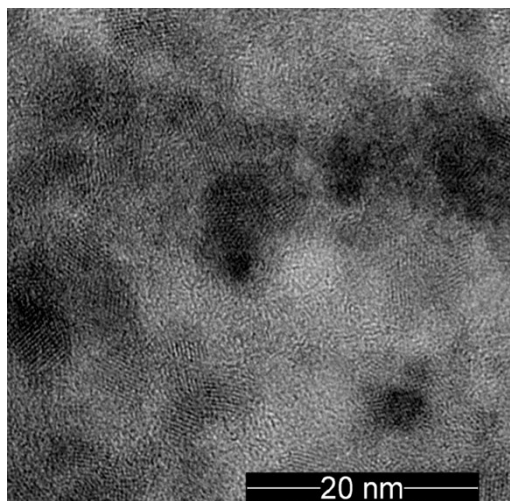

77 Fig. S5 TEM image of PDAD-Mn- ZnS QDs/HA;

78

79

80

81
